# Supplementary material for: Integrated Activity and Genetic Profiling of Secreted Peptidases in Cryptococcus neoformans Reveals an Aspartyl Peptidase Required for Low pH Survival and Virulence
Source: PubMed Central journal article supplement (PMC5158083; doi:10.1371/journal.ppat.1006051), 2016-12-15

A

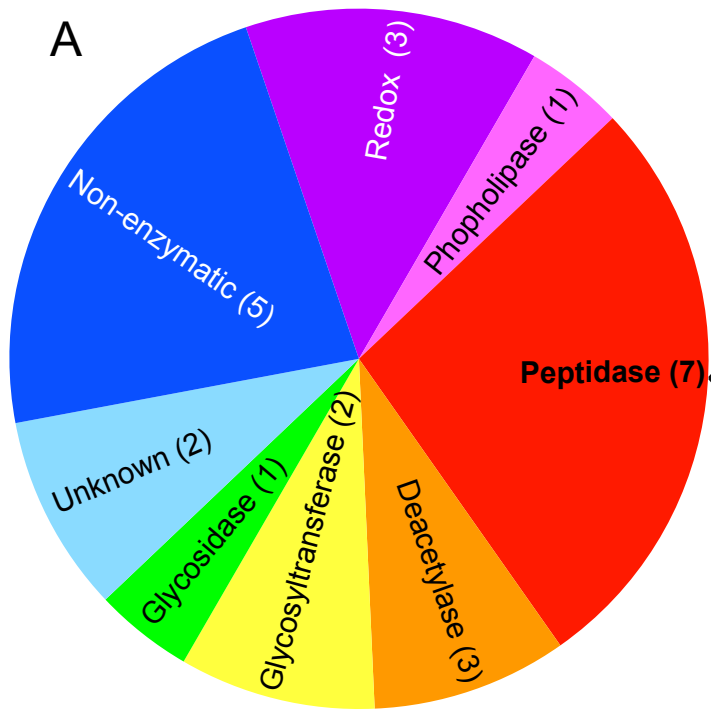

| Peptidase Type                      | Gene       | Uniprot |
|-------------------------------------|------------|---------|
| Serine carboxypeptidase             | CNAG_06640 | J9VTZ8  |
| Carboxypeptidase D                  | CNAG_00919 | J9VTZ8  |
| Serine endopeptidase                | CNAG_04625 | J9W0L4  |
| Aspartyl endopeptidase              | CNAG_00581 | J9VH59  |
| Aspartyl endopeptidase              | CNAG_05872 | J9VS02  |
| Metallo endopeptidase               | CNAG_04735 | J9VXZ9  |
| GPI-anchored aspartyl endopeptidase | CNAG_04380 | J9VUL8  |

B

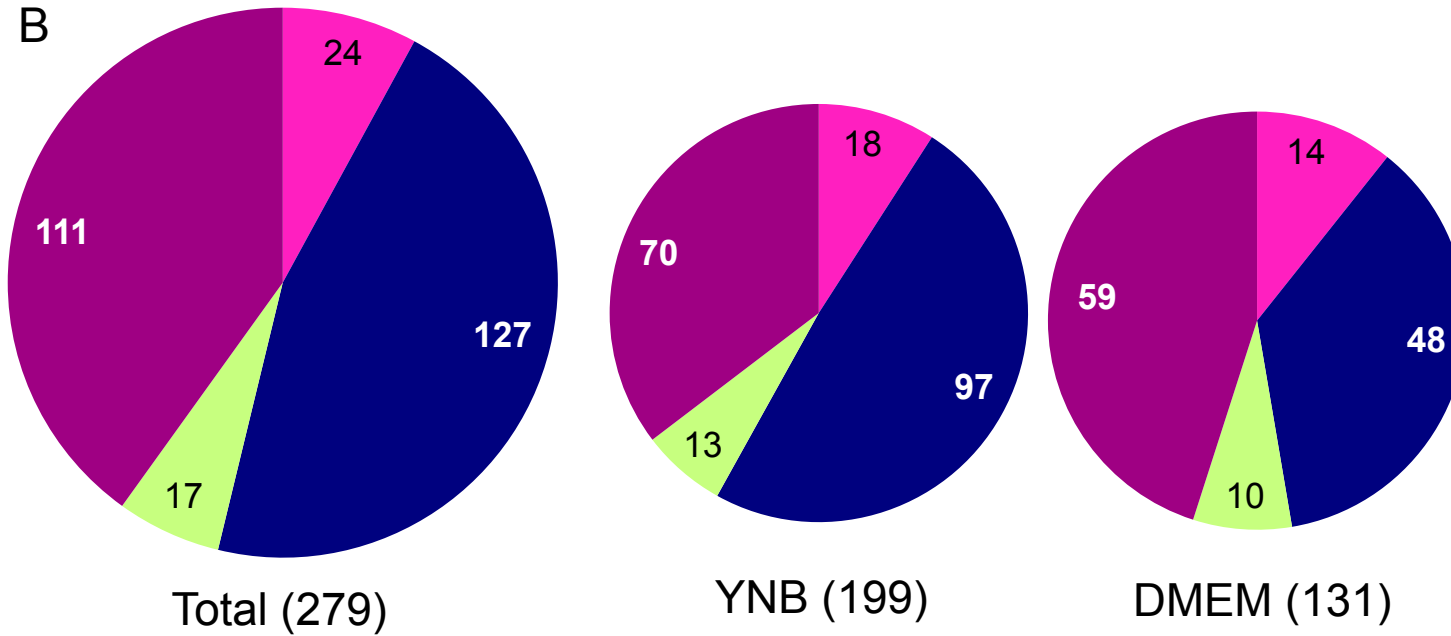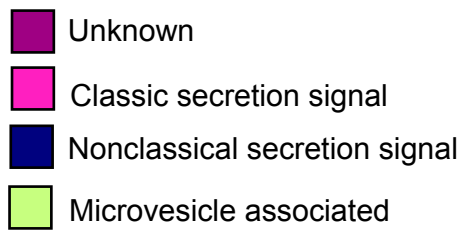

Supplement: ppat.1006051.s003.pdf [file ppat.1006051.s003.pdf]
