# Supplementary material for: Integrated Activity and Genetic Profiling of Secreted Peptidases in Cryptococcus neoformans Reveals an Aspartyl Peptidase Required for Low pH Survival and Virulence
Source: PubMed Central journal article supplement (PMC5158083; doi:10.1371/journal.ppat.1006051), 2016-12-15

**A**

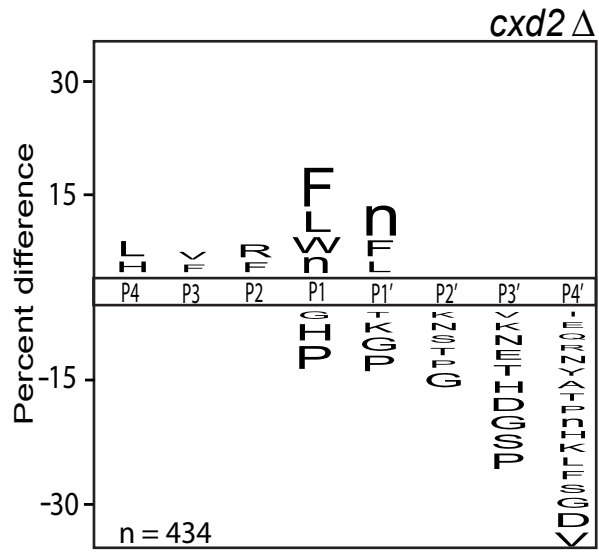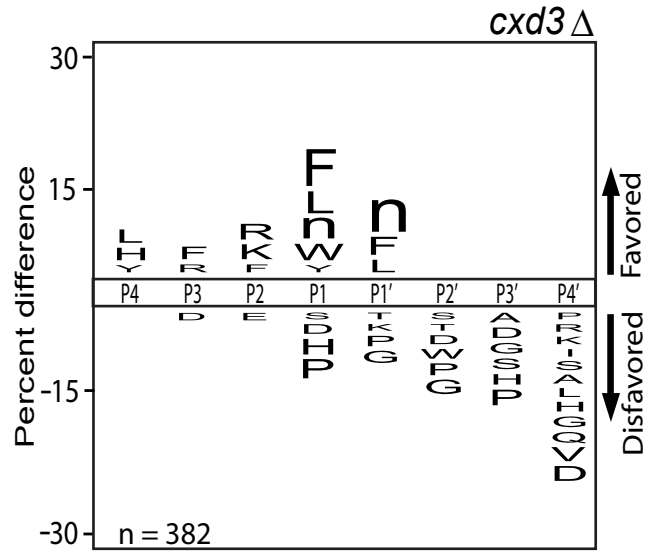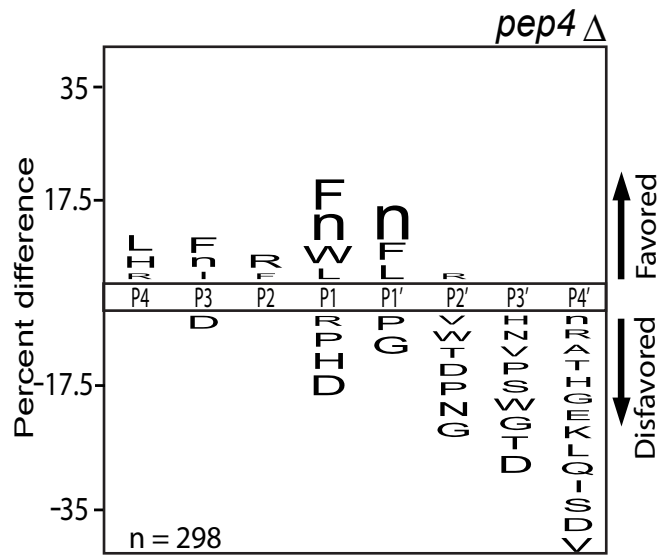

**B**

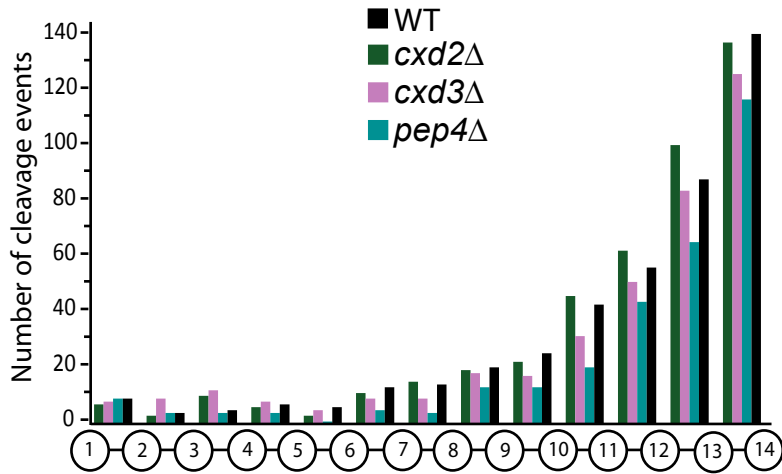

**C**

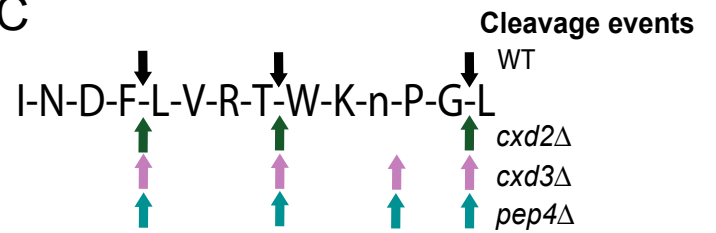

Supplement: ppat.1006051.s005.pdf [file ppat.1006051.s005.pdf]
