# Supplementary material for: Integrated Activity and Genetic Profiling of Secreted Peptidases in Cryptococcus neoformans Reveals an Aspartyl Peptidase Required for Low pH Survival and Virulence
Source: PubMed Central journal article supplement (PMC5158083; doi:10.1371/journal.ppat.1006051), 2016-12-15
Supplement: ppat.1006051.s006.pdf [file ppat.1006051.s006.pdf]

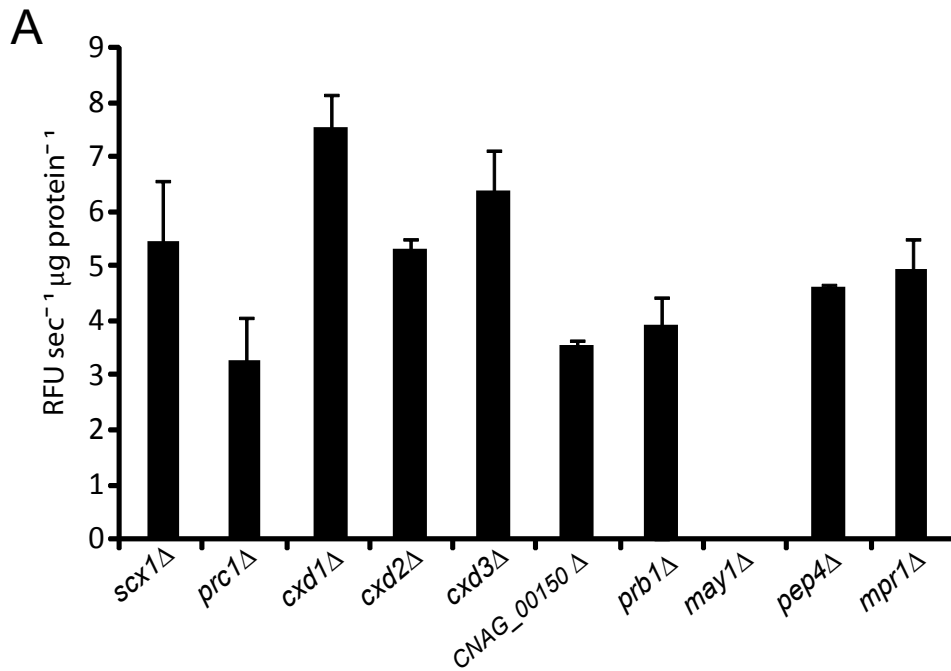

**B**

Start of reaction

%Int. 333 mV[sum= 26314 mV] Profiles 1-79 Smooth Av 1

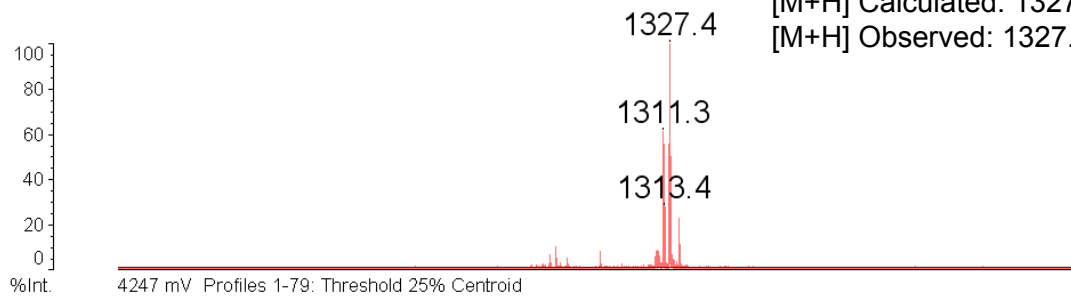

Full length peptide: (mca)GSPAFLAK(dnp)dR  
[M+H] Calculated: 1327.42  
[M+H] Observed: 1327.4

After 24 hour incubation

%Int. 37 mV[sum= 7325 mV] Profiles 1-200 Smooth Av 1

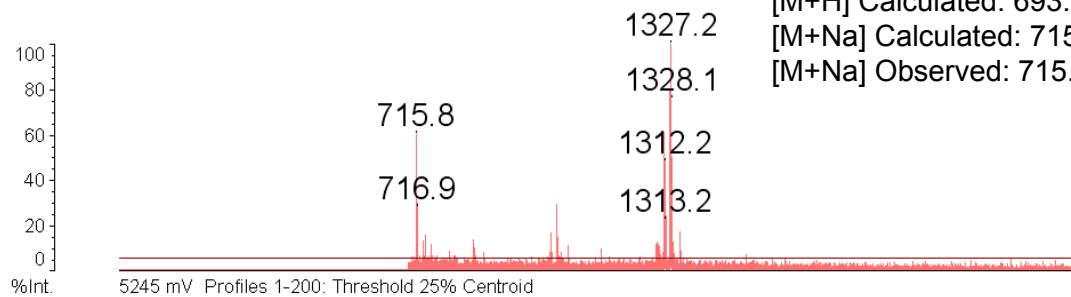

Expected cleavage product: (mca)GSPAF  
[M+H] Calculated: 693.7  
[M+Na] Calculated: 715.6  
[M+Na] Observed: 715.8
